# Supplementary material
Source: PubMed Central journal article supplement (PMC3075760)
Supplement: pp.110.165779_1.pdf [file pp.110.165779_1.pdf]

## Supplemental material

### *Supplemental materials and methods - The construction of the microarray*

#### **Clustering and assembly pipeline**

A dedicated pipeline was set up for clustering and assembling apple sequences for the construction of a 30k microarray (Figure S1). Different parameters were preliminary tested at each step of the clustering process to assess the specificity and reliability of the whole procedure. Only the best final setups are reported below along with a step-by-step description of the bioinformatic tools used to obtain the final tentative contigs.

*Malus x domestica* sequences were downloaded from NCBI Taxonomy database (<http://www.ncbi.nlm.nih.gov/Taxonomy/taxonomyhome.html/index.cgi>), in the nucleotide EST section, and included 539 mRNAs (complete or partial CDS), and 255,411 ESTs, for a total of 255,950 sequences (sequences were retrieved in January 2009). Database records were filtered for uninformative and/or spurious nucleotides (not ACGTN). In the following step sequences were further cleaned and validated. This process was performed with SeqClean (<http://compbio.dfci.harvard.edu/tgi/software/>) tool and consisted of i) low-quality and low-complexity sequences trimming, ii) polyA/T tails removal, and iii) vectors/adaptors contamination removal. UniVec\_core (<http://www.ncbi.nlm.nih.gov/VecScreen/UniVec.html>) was used to recover vectors, adapters, linkers, and primers commonly used to isolate cDNAs. This led to the selection of a dataset consisting of 252,300 sequences. RepeatMasker (<http://www.repeatmasker.org/>) tool was used to screen for interspersed repeats and low-complexity sequences. The screening was made using *Malus x domestica* libraries and the option '-small' returning repetitive regions in lowercase. A total of 1,445,369 bp were masked, including retroelements, small RNAs and simple repeats. Sequences with stretches of masked nucleotides near the ends (within 35 bp from the end) were trimmed. Only sequences longer than 100 bp were considered for the next steps.

The clustering and assembly phase was accomplished by TGIcl tool (<http://compbio.dfci.harvard.edu/tgi/software/>), a software using Megablast (Zhang et al., 2000) for the clustering step (not considering lowercase masked nucleotides) and Cap3 (<http://dendrome.ucdavis.edu/resources/tooldocs/Cap3/readme.html>) for the assembly step (Huang and Madan, 1999). To this end, the following three parameters were chosen: i) 95% of sequence identity between the overlapping region; ii) 60 bp minimum overlap between 2 sequences; iii) 30 bp maximum number of overhanging, unaligned bases. The assembly step produced 77,040 sequences (26,658 contigs and 50,382 singletons). An additional filtering phase was carried out by developing

*ad hoc* Perl scripts to eliminate putative chimera or incorrect clusters, based upon ACE file and quality values produced by CAP3, leading to an increase of the dataset to a total 77,074 sequences, due to the breaking of some clusters. In order to reduce the number of unigenes and remove the redundancy caused by the high-level of stringency, CDhit (Li et al., 2001; Li et al., 2002; Li and Godzik, 2006; <http://bioinformatics.ljcrf.edu/cd-hi/>) tool was launched to group together different unigenes with a strong overlap (90% identity and 70% coverage of shorter sequence). The longest sequence for each group was considered. This process removed similar sequences, but did not affect the contig reliability, because discarded sequences did not contribute to the contig formation. The resulting dataset (48,045 seqs) was blasted against NCBI UniGene db for *Malus x domestica* and the best-hits were collected with high-stringency (90% identity and 80% coverage of UniGene ESTs). The sequences belonging to the same UniGene were grouped, and the longest representative considered, allowing to obtain 41,927 sequences. The transcription orientation was determined by using the relative orientation of the protein best-hit (UniProt). The best-hits were selected according to a minimum 30% identity, 60% similarity and 50% coverage.

### **Annotation of sequences**

Tentative contigs and singletons obtained above were initially annotated with Gene Ontology (GO) terms recovered from the five Uniprot best-hits. Annotations were imported in Blast2GO v2.4.0 (Conesa et al., 2005; Conesa and Goetz, 2008) and further enriched using the built-in tools as described by Botton et al. (2008). In particular, the Annex function (Myhre et al., 2006) was used to increase the total number of annotations. Direct acyclic graphs were traced to recover father GO terms allowing to select the most suitable annotation level for comparisons with other species. Level 2 annotations were finally adopted and compared with those of *Arabidopsis thaliana*, *Vitis vinifera*, *Prunus persica*, and *Populus* publicly available in The Gene Index website (<http://compbio.dfc.harvard.edu/tgi/plant.html>). Pearson correlation coefficient was calculated separately for each GO subvocabulary (molecular function, biological process, and cellular component), in order to assess if the relative proportion of GO categories of apple sequences may resemble those of other dicot species.

### **Microarray design and preparation**

A total of 30,419 oligos were designed with OligoArray 2.1 (Rouillard et al., 2002) by adopting parameters compatible with CombiMatrix protocols ([http://www.combimatrix.com/support\\_docs.htm](http://www.combimatrix.com/support_docs.htm)). Sequences for oligo design were chosen among the 41,927 obtained as described above, with priority given to those with annotation and orientation. Chip layout was planned using Layout Designer 4.2.1 CombiMatrix software

(CombiMatrix, Mulkitoo, USA) with each probe randomly spotted in triplicate. In addition to standard CombiMatrix negative and quality controls included by default in factory layouts, 21 negative controls were designed on bacterial and viral sequences (*Bacillus anthracis* phage Gamma genome, *Haemophilus ducreyi* genome, *Alteromonas* phage PM2 genome) using the same parameters adopted for apple oligos, and checked for cross-hybridization by BLAST searches against all available apple sequences. Microarrays were prepared on Blank 90K CustomArray chips using a 90K/12K CombiMatrix Synthesizer (CombiMatrix, Mulkitoo, USA) with the standard manufacturing and quality control protocols provided by CombiMatrix.

### ***Supplemental references***

- Botton A, Galla G, Conesa A, Bachem C, Ramina A, Barcaccia G** (2008) Large-scale Gene Ontology analysis of plant transcriptome-derived sequences retrieved by AFLP technology. *BMC Genomics* **9**: 347
- Conesa A, Götz S, García-Gómez JM, Terol J, Talon M, Robles M** (2005) Blast2GO: a universal tool for annotation, visualization and analysis in functional genomics research. *Bioinformatics* **21**: 3674–3676
- Conesa A, Götz S** (2008) Blast2GO: A comprehensive suite for functional analysis in plant genomics. *Int J Plant Genomics* **2008**: 1-12
- Huang X, Madan A** (1999) CAP3: A DNA sequence assembly program. *Genome Res* **9**: 868–877
- Li W, Godzik A** (2006) Cd-hit: a fast program for clustering and comparing large sets of protein or nucleotide sequences. *Bioinformatics* **22**: 1658
- Li W, Jaroszewski L, Godzik A** (2001) Clustering of highly homologous sequences to reduce the size of large protein databases. *Bioinformatics* **17**: 282
- Li W, Jaroszewski L, Godzik A** (2002) Tolerating some redundancy significantly speeds up clustering of large protein databases. *Bioinformatics* **18**: 77
- Myhre S, Tveit H, Mollestad T, Laegreid A** (2006) Additional gene ontology structure for improved biological reasoning. *Bioinformatics* **22**: 2020–2027
- Rouillard JM, Herbert CJ, Zuker M** (2002) OligoArray: genome-scale oligonucleotide design for microarrays. *Bioinformatics* **18**: 486–487
- Zhang Z, Schwartz S, Wagner L, Miller W** (2000) A greedy algorithm for aligning DNA sequences. *J Comput Biol* **7**: 203–214

**Table S1 – Globaltest statistics summarizing the associations between expression data in the cortex and fruitlet destiny.**

| Gene set              | No. Genes | Response variable      | T0      |       | T2      |       | T3      |       | Overall |       |
|-----------------------|-----------|------------------------|---------|-------|---------|-------|---------|-------|---------|-------|
|                       |           |                        | P-value | Sign. | P-value | Sign. | P-value | Sign. | P-value | Sign. |
| Spotted genes         | 30,419    | Position <sup>a</sup>  | 0.66667 | ns    | 0.17143 | ns    | 0.17143 | ns    | 0.05040 | *     |
|                       |           | Weight                 | 0.12500 | ns    | 0.36493 | ns    | 0.49528 | ns    | 0.21072 | ns    |
|                       |           | Treatment <sup>b</sup> | 0.75000 | ns    | 0.91429 | ns    | 0.05714 | *     | 0.06500 | *     |
|                       |           | Destiny <sup>c</sup>   | 0.25000 | ns    | 0.02857 | *     | 0.01190 | *     | 0.00359 | **    |
| Variable              | 4,361     | Position <sup>a</sup>  | 0.66667 | ns    | 0.14286 | ns    | 0.17143 | ns    | 0.02371 | *     |
|                       |           | Weight                 | 0.16667 | ns    | 0.29722 | ns    | 0.43178 | ns    | 0.14749 | ns    |
|                       |           | Treatment <sup>b</sup> | 0.75000 | ns    | 0.62857 | ns    | 0.05714 | *     | 0.07296 | *     |
|                       |           | Destiny <sup>c</sup>   | 0.25000 | ns    | 0.02143 | *     | 0.00714 | **    | 0.00117 | **    |
| ABA                   | 190       | Position <sup>a</sup>  | 0.66667 | ns    | 0.11429 | ns    | 0.08571 | *     | 0.01061 | *     |
|                       |           | Weight                 | 0.25000 | ns    | 0.26541 | ns    | 0.32293 | ns    | 0.06722 | *     |
|                       |           | Treatment <sup>b</sup> | 0.50000 | ns    | 0.45714 | ns    | 0.14286 | ns    | 0.10849 | ns    |
|                       |           | Destiny <sup>c</sup>   | 0.25000 | ns    | 0.00952 | **    | 0.00476 | **    | 0.00045 | ***   |
| Auxin                 | 313       | Position <sup>a</sup>  | 0.66667 | ns    | 0.11429 | ns    | 0.28571 | ns    | 0.03930 | *     |
|                       |           | Weight                 | 0.12500 | ns    | 0.39521 | ns    | 0.54183 | ns    | 0.18662 | ns    |
|                       |           | Treatment <sup>b</sup> | 0.50000 | ns    | 0.94286 | ns    | 0.14286 | ns    | 0.12741 | ns    |
|                       |           | Destiny <sup>c</sup>   | 0.25000 | ns    | 0.06429 | *     | 0.04048 | *     | 0.00228 | **    |
| Cytokinin             | 70        | Position <sup>a</sup>  | 0.66667 | ns    | 0.14286 | ns    | 0.11429 | ns    | 0.01285 | *     |
|                       |           | Weight                 | 0.29167 | ns    | 0.19734 | ns    | 0.26819 | ns    | 0.13789 | ns    |
|                       |           | Treatment <sup>b</sup> | 0.50000 | ns    | 0.25714 | ns    | 0.08571 | *     | 0.06448 | *     |
|                       |           | Destiny <sup>c</sup>   | 0.25000 | ns    | 0.01429 | *     | 0.00238 | **    | 0.00051 | ***   |
| Ethylene              | 165       | Position <sup>a</sup>  | 0.66667 | ns    | 0.20000 | ns    | 0.37143 | ns    | 0.07157 | *     |
|                       |           | Weight                 | 0.12500 | ns    | 0.37615 | ns    | 0.48997 | ns    | 0.24528 | ns    |
|                       |           | Treatment <sup>b</sup> | 0.75000 | ns    | 0.82857 | ns    | 0.14286 | ns    | 0.14176 | ns    |
|                       |           | Destiny <sup>c</sup>   | 0.25000 | ns    | 0.03333 | *     | 0.07381 | *     | 0.00524 | **    |
| Gibberellin           | 72        | Position <sup>a</sup>  | 0.66667 | ns    | 0.02857 | *     | 0.08571 | *     | 0.00504 | **    |
|                       |           | Weight                 | 0.16667 | ns    | 0.22502 | ns    | 0.29211 | ns    | 0.04685 | *     |
|                       |           | Treatment <sup>b</sup> | 0.75000 | ns    | 0.97143 | ns    | 0.14286 | ns    | 0.23505 | ns    |
|                       |           | Destiny <sup>c</sup>   | 0.25000 | ns    | 0.05000 | *     | 0.00238 | **    | 0.00048 | ***   |
| Minor hormones        | 152       | Position <sup>a</sup>  | 0.66667 | ns    | 0.34286 | ns    | 0.14286 | ns    | 0.07432 | *     |
|                       |           | Weight                 | 0.12500 | ns    | 0.56089 | ns    | 0.45846 | ns    | 0.19304 | ns    |
|                       |           | Treatment <sup>b</sup> | 1.00000 | ns    | 0.71429 | ns    | 0.08571 | *     | 0.17825 | ns    |
|                       |           | Destiny <sup>c</sup>   | 0.25000 | ns    | 0.40000 | ns    | 0.00714 | **    | 0.01085 | *     |
| Transcription factors | 977       | Position <sup>a</sup>  | 1.00000 | ns    | 0.17143 | ns    | 0.11429 | ns    | 0.04591 | *     |
|                       |           | Weight                 | 0.25000 | ns    | 0.34399 | ns    | 0.35985 | ns    | 0.19634 | ns    |
|                       |           | Treatment <sup>b</sup> | 0.75000 | ns    | 0.91429 | ns    | 0.08571 | *     | 0.12823 | ns    |
|                       |           | Destiny <sup>c</sup>   | 0.25000 | ns    | 0.03095 | *     | 0.00476 | **    | 0.00191 | **    |

a) Lateral vs central

b) Untreated vs treated with BA

c) Abscising vs persisting

ns=non-significant ( $P \geq 0.1$ )

\*=significant ( $P < 0.1$ )

\*\*=highly significant ( $P < 0.01$ )

\*\*\*=extremely significant ( $P < 0.001$ )



**Table S2 – Globaltest statistics summarizing the associations between expression data in the seed and fruitlet destiny.**

| Gene set       | No. Genes | Response variable      | T0      |       | T2      |       | T3      |       | Overall |       |
|----------------|-----------|------------------------|---------|-------|---------|-------|---------|-------|---------|-------|
|                |           |                        | P-value | Sign. | P-value | Sign. | P-value | Sign. | P-value | Sign. |
| Spotted genes  | 30,419    | Position <sup>a</sup>  | 0.66667 | ns    | 0.45714 | ns    | 0.17143 | ns    | 0.18350 | ns    |
|                |           | Weight                 | 0.08333 | *     | 0.12233 | ns    | 0.06858 | *     | 0.00827 | **    |
|                |           | Treatment <sup>b</sup> | 1.00000 | ns    | 0.11429 | ns    | 0.37143 | ns    | 0.20484 | ns    |
|                |           | Destiny <sup>c</sup>   | 0.50000 | ns    | 0.43571 | ns    | 0.01667 | *     | 0.01170 | *     |
| Variable       | 4,276     | Position <sup>a</sup>  | 0.66667 | ns    | 0.45714 | ns    | 0.20000 | ns    | 0.09562 | *     |
|                |           | Weight                 | 0.08333 | *     | 0.08679 | *     | 0.04510 | *     | 0.00084 | ***   |
|                |           | Treatment <sup>b</sup> | 1.00000 | ns    | 0.05714 | *     | 0.40000 | ns    | 0.16630 | ns    |
|                |           | Destiny <sup>c</sup>   | 0.25000 | ns    | 0.36190 | ns    | 0.03333 | *     | 0.00478 | **    |
| ABA            | 190       | Position <sup>a</sup>  | 0.66667 | ns    | 0.42857 | ns    | 0.22857 | ns    | 0.03741 | *     |
|                |           | Weight                 | 0.08333 | *     | 0.05896 | *     | 0.07442 | *     | 0.00424 | **    |
|                |           | Treatment <sup>b</sup> | 1.00000 | ns    | 0.17143 | ns    | 0.31429 | ns    | 0.50632 | ns    |
|                |           | Destiny <sup>c</sup>   | 0.25000 | ns    | 0.69286 | ns    | 0.01905 | *     | 0.00355 | **    |
| Auxin          | 313       | Position <sup>a</sup>  | 1.00000 | ns    | 0.57143 | ns    | 0.14286 | ns    | 0.06846 | *     |
|                |           | Weight                 | 0.04167 | *     | 0.07862 | *     | 0.05381 | *     | 0.00148 | **    |
|                |           | Treatment <sup>b</sup> | 1.00000 | ns    | 0.05714 | *     | 0.31429 | ns    | 0.24623 | ns    |
|                |           | Destiny <sup>c</sup>   | 0.50000 | ns    | 0.47381 | ns    | 0.00952 | **    | 0.00971 | **    |
| Cytokinin      | 70        | Position <sup>a</sup>  | 1.00000 | ns    | 0.82857 | ns    | 0.20000 | ns    | 0.23853 | ns    |
|                |           | Weight                 | 0.04167 | *     | 0.08257 | *     | 0.08890 | *     | 0.01813 | *     |
|                |           | Treatment <sup>b</sup> | 1.00000 | ns    | 0.17143 | ns    | 0.22857 | ns    | 0.34261 | ns    |
|                |           | Destiny <sup>c</sup>   | 0.50000 | ns    | 0.74286 | ns    | 0.01667 | *     | 0.01162 | *     |
| Ethylene       | 165       | Position <sup>a</sup>  | 0.66667 | ns    | 0.51429 | ns    | 0.20000 | ns    | 0.10813 | ns    |
|                |           | Weight                 | 0.08333 | *     | 0.07559 | *     | 0.04037 | *     | 0.00173 | **    |
|                |           | Treatment <sup>b</sup> | 1.00000 | ns    | 0.11429 | ns    | 0.42857 | ns    | 0.43325 | ns    |
|                |           | Destiny <sup>c</sup>   | 0.50000 | ns    | 0.84048 | ns    | 0.03095 | *     | 0.01865 | *     |
| Gibberellin    | 72        | Position <sup>a</sup>  | 1.00000 | ns    | 0.74286 | ns    | 0.20000 | ns    | 0.05382 | *     |
|                |           | Weight                 | 0.37500 | ns    | 0.06059 | *     | 0.05542 | *     | 0.00423 | **    |
|                |           | Treatment <sup>b</sup> | 1.00000 | ns    | 0.11429 | ns    | 0.48571 | ns    | 0.40545 | ns    |
|                |           | Destiny <sup>c</sup>   | 0.25000 | ns    | 0.48095 | ns    | 0.02143 | *     | 0.00260 | **    |
| Minor hormones | 152       | Position <sup>a</sup>  | 0.66667 | ns    | 0.48571 | ns    | 0.14286 | ns    | 0.05859 | *     |
|                |           | Weight                 | 0.08333 | *     | 0.12111 | ns    | 0.04041 | *     | 0.00130 | **    |
|                |           | Treatment <sup>b</sup> | 1.00000 | ns    | 0.08571 | *     | 0.54286 | ns    | 0.28445 | ns    |
|                |           | Destiny <sup>c</sup>   | 0.25000 | ns    | 0.60952 | ns    | 0.04286 | *     | 0.01077 | *     |
| Trans. factors | 977       | Position <sup>a</sup>  | 0.66667 | ns    | 0.60000 | ns    | 0.20000 | ns    | 0.11529 | ns    |
|                |           | Weight                 | 0.16667 | ns    | 0.12182 | ns    | 0.05369 | *     | 0.00457 | **    |
|                |           | Treatment <sup>b</sup> | 1.00000 | ns    | 0.05714 | *     | 0.34286 | ns    | 0.27578 | ns    |
|                |           | Destiny <sup>c</sup>   | 0.25000 | ns    | 0.60238 | ns    | 0.01905 | *     | 0.00977 | **    |

a) Lateral vs central

b) Untreated vs treated with BA

c) Abscising vs persisting

ns=non-significant (P>=0.1)

\*=significant (P<0.1)

\*\*=highly significant (P<0.01)

\*\*\*=extremely significant (P<0.001)

**Table S3 – Number of DE genes in all the sample combinations with a score  $\geq 0.5$  (see materials and methods section for a detailed description of the statistical analyses).**

|                |      | Lateral fruits |     |     |     |     |     |     |     |     |     |     | Central fruits |     |     |     |     |     |     |     |     |     |     | Cortex |
|----------------|------|----------------|-----|-----|-----|-----|-----|-----|-----|-----|-----|-----|----------------|-----|-----|-----|-----|-----|-----|-----|-----|-----|-----|--------|
|                |      | CTRL           |     |     |     |     |     | +BA |     |     |     |     | CTRL           |     |     |     |     |     | +BA |     |     |     |     |        |
|                |      | L1             |     |     | L3  |     |     | LB1 |     | LB3 |     |     | C1             |     |     | C3  |     |     | CB1 |     | CB3 |     |     |        |
|                |      | T0             | T2  | T3  | T0  | T2  | T3  | T2  | T3  | T2  | T3  | T0  | T2             | T3  | T0  | T2  | T3  | T2  | T3  | T2  | T3  |     |     |        |
| Lateral fruits | CTRL | L1             | T0  | █   | 188 | 198 | 203 | 456 | 222 | 51  | 32  | 219 | 31             | 492 | 373 | 225 | 242 | 255 | 238 | 225 | 146 | 340 | 192 |        |
|                |      |                | T2  | 97  | █   | 225 | 458 | 336 | 291 | 46  | 10  | 270 | 20             | 385 | 368 | 107 | 479 | 260 | 219 | 436 | 152 | 299 | 229 |        |
|                |      |                | T3  | 181 | 78  | █   | 334 | 282 | 360 | 527 | 13  | 458 | 12             | 267 | 321 | 139 | 383 | 359 | 179 | 242 | 450 | 337 | 326 |        |
|                | L3   | T0             | 116 | 141 | 264 | █   | 65  | 352 | 130 | 40  | 303 | 19  | 62             | 258 | 78  | 77  | 165 | 120 | 111 | 169 | 132 | 115 |     |        |
|                |      | T2             | 178 | 224 | 271 | 56  | █   | 430 | 191 | 41  | 220 | 33  | 205            | 261 | 193 | 56  | 118 | 96  | 110 | 137 | 198 | 167 |     |        |
|                |      | T3             | 514 | 359 | 480 | 38  | 104 | █   | 215 | 35  | 598 | 54  | 193            | 274 | 97  | 305 | 226 | 315 | 293 | 207 | 267 | 379 |     |        |
| +BA            | LB1  | T2             | 183 | 273 | 151 | 163 | 382 | 338 | █   | 15  | 102 | 27  | 193            | 126 | 122 | 96  | 126 | 119 | 83  | 124 | 90  | 124 |     |        |
|                |      | T3             | 269 | 185 | 299 | 283 | 378 | 547 | 319 | █   | 17  | 783 | 50             | 30  | 59  | 21  | 48  | 93  | 39  | 60  | 29  | 18  |     |        |
|                | LB3  | T2             | 362 | 157 | 347 | 52  | 53  | 68  | 29  | 358 | █   | 16  | 253            | 351 | 117 | 295 | 251 | 150 | 138 | 87  | 127 | 235 |     |        |
|                |      | T3             | 278 | 302 | 536 | 31  | 56  | 83  | 428 | 532 | 79  | █   | 30             | 24  | 41  | 8   | 32  | 76  | 38  | 13  | 26  | 1   |     |        |
| Central fruits | CTRL | C1             | T0  | 312 | 579 | 474 | 59  | 136 | 200 | 185 | 432 | 118 | 132            | █   | 170 | 78  | 50  | 105 | 74  | 183 | 98  | 211 | 197 |        |
|                |      |                | T2  | 168 | 141 | 182 | 195 | 217 | 448 | 318 | 324 | 165 | 404            | 207 | █   | 108 | 282 | 228 | 167 | 207 | 123 | 267 | 243 |        |
|                |      |                | T3  | 563 | 322 | 525 | 31  | 62  | 125 | 249 | 643 | 116 | 146            | 151 | 412 | █   | 53  | 94  | 84  | 173 | 55  | 297 | 57  |        |
|                |      | C3             | T0  | 203 | 204 | 320 | 40  | 123 | 48  | 283 | 493 | 54  | 100            | 84  | 368 | 47  | █   | 107 | 94  | 62  | 44  | 138 | 93  |        |
|                |      |                | T2  | 195 | 435 | 532 | 171 | 107 | 23  | 227 | 554 | 62  | 77             | 255 | 430 | 55  | 56  | █   | 69  | 100 | 62  | 114 | 97  |        |
|                |      |                | T3  | 445 | 485 | 516 | 57  | 184 | 171 | 642 | 605 | 96  | 212            | 259 | 559 | 91  | 145 | 63  | █   | 183 | 80  | 114 | 67  |        |
|                | +BA  | CB1            | T2  | 360 | 68  | 125 | 47  | 57  | 119 | 43  | 131 | 41  | 81             | 79  | 93  | 123 | 45  | 65  | 169 | █   | 68  | 114 | 105 |        |
|                |      |                | T3  | 188 | 80  | 112 | 400 | 232 | 366 | 293 | 73  | 114 | 306            | 218 | 178 | 299 | 248 | 381 | 466 | 87  | █   | 47  | 16  |        |
|                |      | CB3            | T2  | 319 | 138 | 186 | 84  | 88  | 77  | 89  | 316 | 17  | 102            | 123 | 182 | 116 | 61  | 62  | 123 | 40  | 174 | █   | 128 |        |
|                |      | T3             | 367 | 345 | 469 | 238 | 155 | 171 | 344 | 641 | 86  | 238 | 238            | 672 | 165 | 142 | 46  | 248 | 152 | 845 | 102 | █   |     |        |
| Seed           |      |                |     |     |     |     |     |     |     |     |     |     |                |     |     |     |     |     |     |     |     |     |     |        |

**Table S4 – Genes differentially expressed in the cortex of fruitlets that were induced to abscise upon BA treatment.**

A tentative annotation (with EC number when available), and the expression pattern is reported for each gene (up\_J = up-regulated from T0 to T2; down\_J = down-regulated from T0 to T2; up\_K = up-regulated from T2 to T3; down\_K = down-regulated from T2 to T3).

| Gene ID      | Tentative annotation (EC)                                       | Molecular function                      | Exp.   |
|--------------|-----------------------------------------------------------------|-----------------------------------------|--------|
| Md_1:85:a    | Extensin                                                        | Structural constituent of cell wall     | up_J   |
| Md_10757:1:a | Uncharacterized protein                                         | Unknown molecular function              | up_J   |
| Md_10798:1:a | Amino acid permease                                             | Substrate-specific transporter activity | up_J   |
| Md_10973:1:a | Heat shock protein binding protein                              | Protein binding                         | down_J |
| Md_1109:1:a  | WRKY53 transcription factor                                     | Nucleic acid binding                    | up_J   |
| Md_11157:1:a | 3'-N-debenzoyl-2'-deoxytaxol N-benzoyltransferase (EC=2.3.1.15) | Transferase activity                    | up_J   |
| Md_1122:1:a  | NAC/NAM transcription factor                                    | Nucleic acid binding                    | up_J   |
| Md_1133:1:a  | LEA/dehydrin                                                    | Unknown molecular function              | up_J   |
| Md_116911:s  | No match found                                                  | Unknown molecular function              | down_J |
| Md_117252:s  | WRKY53 transcription factor                                     | Nucleic acid binding                    | up_J   |
| Md_118786:s  | Cytochrome P450 (EC=1.14.13.88)                                 | Ion binding, oxidoreductase activity    | up_J   |
| Md_11946:1:a | No match found                                                  | Unknown molecular function              | down_J |
| Md_119754:s  | MYC1 transcription factor                                       | Nucleic acid binding                    | up_J   |
| Md_12040:1:a | F-box family protein                                            | Protein binding                         | up_J   |
| Md_121294:s  | Ethylene-responsive AP2/ERF transcription factor                | Nucleic acid binding                    | up_J   |
| Md_12188:1:a | Uncharacterized protein                                         | Unknown molecular function              | up_J   |

|              |                                                                       |                                                                             |        |
|--------------|-----------------------------------------------------------------------|-----------------------------------------------------------------------------|--------|
| Md_12387:1:a | SNF1-related kinase 3.10 (EC=2.7.11.1)                                | Ion binding, transferase activity, nucleotide binding, protein binding      | up_J   |
| Md_12393:1:a | NAC/NAM transcription factor                                          | Nucleic acid binding                                                        | up_J   |
| Md_124:5:a   | Repetitive proline-rich cell wall protein                             | Structural constituent of cell wall                                         | down_K |
| Md_125:1:a   | No match found                                                        | Unknown molecular function                                                  | up_J   |
| Md_12505:1:a | Uncharacterized protein                                               | Unknown molecular function                                                  | up_J   |
| Md_1257:1:a  | Polyphenol oxidase, chloroplastic (EC=1.10.3.1)                       | Ion binding, oxidoreductase activity                                        | up_J   |
| Md_126596:s  | Ribulose biphosphate carboxylase large chain (EC=4.1.1.39)            | Oxidoreductase activity, lyase activity, transmembrane transporter activity | up_J   |
| Md_128142:s  | Aldehyde dehydrogenase family 2 member B7, mitochondrial (EC=1.2.1.3) | Oxidoreductase activity                                                     | up_J   |
| Md_128177:s  | Extensin                                                              | Structural constituent of cell wall                                         | up_J   |
| Md_131178:s  | 14-3-3-like protein                                                   | Protein binding                                                             | down_J |
| Md_132098:s  | Pectate lyase (EC=4.2.2.2)                                            | Ion binding, lyase activity, transmembrane transporter activity             | up_J   |
| Md_13311:1:a | Uncharacterized protein                                               | Transferase activity                                                        | up_K   |
| Md_135689:s  | ADP-ribosylation factor, ARF                                          | Nucleotide binding, signal transducer activity                              | down_J |
| Md_136185:s  | Major allergen Mal d 1.03G                                            | Unknown molecular function                                                  | up_J   |
| Md_136858:s  | No match found                                                        | Unknown molecular function                                                  | up_J   |
| Md_137415:s  | Amino acid permease                                                   | Substrate-specific transporter activity                                     | up_J   |
| Md_13801:s   | No match found                                                        | Unknown molecular function                                                  | down_J |
| Md_13809:1:a | Uncharacterized protein                                               | Unknown molecular function                                                  | down_J |
| Md_13835:1:a | Uncharacterized protein                                               | Unknown molecular function                                                  | down_J |
| Md_14070:1:a | Gibberellin 2-oxidase (EC=1.14.11.-)                                  | Ion binding, oxidoreductase activity                                        | up_J   |

|              |                                                              |                                                                      |        |
|--------------|--------------------------------------------------------------|----------------------------------------------------------------------|--------|
| Md_140962:s  | BRI1-associated receptor kinase 1 (BAK1) (EC=2.7.11.23)      | Transferase activity, nucleotide binding                             | up_J   |
| Md_1412:1:a  | FERONIA receptor-like kinase                                 | Transferase activity, nucleotide binding, signal transducer activity | up_J   |
| Md_14276:1:a | No match found                                               | Unknown molecular function                                           | up_J   |
| Md_14497:1:a | Xyloglucan-specific endoglucanase inhibitor protein          | Hydrolase activity                                                   | up_J   |
| Md_1457:2:a  | Sieve element-occluding protein                              | Unknown molecular function                                           | up_J   |
| Md_153461:s  | Uncharacterized protein                                      | Unknown molecular function                                           | up_J   |
| Md_154937:s  | Calmodulin binding protein                                   | Protein binding                                                      | down_J |
| Md_15501:1:a | Uncharacterized protein                                      | Unknown molecular function                                           | up_J   |
| Md_157343:s  | Uncharacterized protein                                      | Nucleotide binding, ligase activity                                  | up_J   |
| Md_160:4:a   | Quinone oxidoreductase (EC=1.6.5.5)                          | Ion binding, oxidoreductase activity                                 | down_K |
| Md_16050:1:a | Uncharacterized protein                                      | Unknown molecular function                                           | up_J   |
| Md_16163:1:a | Protein transport protein Sec23                              | Ion binding, protein binding                                         | up_J   |
| Md_16256:1:a | Multidrug resistance protein 1, 2 (EC=3.6.3.27, EC=3.6.3.44) | Hydrolase activity, nucleotide binding                               | up_J   |
| Md_16774:1:a | 23S rRNA methyltransferase (EC=2.1.1.-)                      | Transferase activity, nucleic acid binding                           | up_J   |
| Md_16774:1:a | 23S rRNA methyltransferase (EC=2.1.1.48)                     | Transferase activity, nucleic acid binding                           | down_K |
| Md_167974:s  | DNA-directed RNA polymerase subunit beta (EC=2.7.7.6)        | Transferase activity, nucleic acid binding                           | up_J   |
| Md_169133:s  | ATPase subunit 8 (EC=3.6.3.14)                               | Hydrolase activity, substrate-specific transporter activity          | up_J   |
| Md_1709:2:a  | EIL2 (EIN3-like)                                             | Nucleotide binding, signal transducer activity                       | up_J   |
| Md_171:2:a   | Chloroplast envelope membrane protein                        | Substrate-specific transporter activity                              | up_J   |
| Md_17245:1:a | Serine-threonine protein kinase (EC=1.3.1.74)                | Transferase activity, nucleotide binding, protein binding            | up_J   |

|              |                                                       |                                                                                              |        |
|--------------|-------------------------------------------------------|----------------------------------------------------------------------------------------------|--------|
| Md_1741:2:a  | Senescence-associated protein                         | Unknown molecular function                                                                   | up_J   |
| Md_174442:s  | Uncharacterized protein                               | Structural constituent of ribosome                                                           | up_J   |
| Md_17792:1:a | Cytochrome C oxidase subunit (EC=1.9.3.1)             | Oxidoreductase activity, substrate-specific transporter activity                             | up_J   |
| Md_179063:s  | Dynamin                                               | Hydrolase activity, nucleotide binding, lipid binding                                        | up_J   |
| Md_1791:1:a  | DNA-directed RNA polymerase subunit beta (EC=2.7.7.6) | Transferase activity, nucleic acid binding                                                   | up_J   |
| Md_179488:s  | Transcription factor                                  | Hydrolase activity, protein binding, nucleic acid binding                                    | up_J   |
| Md_18018:1:a | No match found                                        | Unknown molecular function                                                                   | up_J   |
| Md_182062:s  | No match found                                        | Unknown molecular function                                                                   | up_J   |
| Md_18337:1:a | NADH-ubiquinone oxidoreductase chain 1 (EC=1.6.5.3)   | Oxidoreductase activity                                                                      | up_J   |
| Md_18421:1:a | Uncharacterized protein                               | Ion binding, hydrolase activity, nucleotide binding, substrate-specific transporter activity | down_J |
| Md_185136:s  | Uracil phosphoribosyltransferase (EC=2.4.2.9)         | Transferase activity, nucleotide binding                                                     | up_J   |
| Md_18993:1:a | Disease resistance response protein                   | Unknown molecular function                                                                   | down_J |
| Md_19496:1:a | Zinc finger DHHC domain-containing protein At3g22180  | Ion binding, transferase activity                                                            | up_J   |
| Md_19664:1:a | Uncharacterized protein                               | Unknown molecular function                                                                   | up_J   |
| Md_19747:1:a | Laccase (EC=1.10.3.3)                                 | Ion binding, oxidoreductase activity                                                         | up_J   |
| Md_19796:1:a | Uncharacterized protein                               | Signal transducer activity                                                                   | up_J   |
| Md_2007:2:a  | Cytochrome P450 (EC=1.14.13.-)                        | Ion binding, oxidoreductase activity                                                         | up_J   |
| Md_2007:4:a  | Cytochrome P450 (EC=1.14.13.21)                       | Ion binding, oxidoreductase activity                                                         | up_J   |
| Md_200958:s  | Zinc-finger C2H2 protein SERRATE                      | Ion binding                                                                                  | up_J   |
| Md_201734:s  | Nucleic acid binding protein                          | Nucleotide binding, nucleic acid binding                                                     | up_J   |

|               |                                                                 |                                                                                |        |
|---------------|-----------------------------------------------------------------|--------------------------------------------------------------------------------|--------|
| Md_20223:1:a  | Xylan endohydrolase (EC=3.2.1.8)                                | Ion binding, hydrolase activity                                                | up_J   |
| Md_203119:s   | Ceramidase (EC=3.5.1.23)                                        | Hydrolase activity                                                             | up_J   |
| Md_20392:1:a  | Anthocyanin 5-aromatic acyltransferase (EC=2.3.1.153)           | Transferase activity                                                           | down_J |
| Md_20453:1:a  | Aspartic proteinase nepenthesin (EC=3.4.23.12)                  | Hydrolase activity, nucleic acid binding                                       | up_J   |
| Md_20585:1:a  | Cleavage and polyadenylation specificity factor, 73 kDa subunit | Hydrolase activity, protein binding                                            | up_J   |
| Md_207445:s   | Peroxisomal membrane ABC transporter family                     | Hydrolase activity, nucleotide binding                                         | up_J   |
| Md_210798:s   | No match found                                                  | Unknown molecular function                                                     | down_J |
| Md_2112:1:a   | Nucleic acid binding protein                                    | Nucleotide binding, nucleic acid binding                                       | up_J   |
| Md_212068:s   | Uncharacterized protein                                         | Unknown molecular function                                                     | down_J |
| Md_214104:s   | Gibberellin 2-oxidase (EC=1.14.11.-)                            | Ion binding, oxidoreductase activity                                           | up_J   |
| Md_214706:s   | Kinase (EC=2.7.10.2)                                            | Ion binding, transferase activity, oxidoreductase activity, nucleotide binding | up_J   |
| Md_219419:s   | No match found                                                  | Unknown molecular function                                                     | up_J   |
| Md_219650:s   | No match found                                                  | Unknown molecular function                                                     | down_J |
| Md_22:8:a     | Hydrolase, hydrolyzing O-glycosyl compounds (EC=2.4.1.67)       | Hydrolase activity                                                             | up_J   |
| Md_225721:s   | ATP binding protein                                             | Hydrolase activity, nucleotide binding                                         | up_J   |
| Md_2258:1:a   | Uncharacterized protein                                         | Unknown molecular function                                                     | up_J   |
| Md_226587:s   | TIP GROWTH DEFECTIVE 1                                          | Ion binding, transferase activity, acyl binding                                | up_J   |
| Md_2280:1:0:b | Leucoanthocyanidin dioxygenase (EC=1.14.11.19)                  | Ion binding, oxidoreductase activity                                           | up_J   |
| Md_232357:s   | Uncharacterized protein                                         | Ion binding, transferase activity, nucleotide binding, nucleic acid binding    | up_K   |
| Md_2328:2:a   | ATP sulfurylase (EC=2.7.7.4)                                    | Transferase activity                                                           | up_J   |

|               |                                                                      |                                                                      |        |
|---------------|----------------------------------------------------------------------|----------------------------------------------------------------------|--------|
| Md_2343:1:a   | Carboxylesterase (EC=3.1.1.1)                                        | Hydrolase activity                                                   | up_J   |
| Md_235374:s   | No match found                                                       | Unknown molecular function                                           | up_J   |
| Md_240669:s   | Ubiquitin-protein ligase (EC=6.3.2.19)                               | Ligase activity                                                      | up_J   |
| Md_241340:s   | No match found                                                       | Unknown molecular function                                           | down_J |
| Md_241578:s   | Fructose-1,6-bisphosphatase, chloroplastic (EC=3.1.3.11)             | Ion binding, hydrolase activity                                      | down_J |
| Md_242520:s   | Fimbrin                                                              | Protein binding                                                      | up_J   |
| Md_246922:s   | Terpene synthase                                                     | Ion binding, lyase activity, transmembrane transporter activity      | up_J   |
| Md_246936:s   | Mitogen-activated protein kinase (MAPK) (EC=2.7.11.24)               | Transferase activity, nucleotide binding, signal transducer activity | up_J   |
| Md_249698:s   | Ethylene-responsive AP2/ERF transcription factor                     | Nucleic acid binding                                                 | up_J   |
| Md_25179:s    | Gibberellin 2-oxidase (EC=1.14.11.-)                                 | Ion binding, oxidoreductase activity                                 | up_J   |
| Md_253006:s   | AMP-activated protein kinase, gamma regulatory subunit (EC=2.7.11.3) | Transferase activity                                                 | up_J   |
| Md_255371:s   | 26S protease regulatory subunit 7                                    | Hydrolase activity, nucleotide binding                               | down_J |
| Md_2556:1:a   | GASA4-like protein                                                   | Unknown molecular function                                           | down_J |
| Md_2568:2:a   | Leucoanthocyanidin dioxygenase (EC=1.14.11.19)                       | Ion binding, oxidoreductase activity                                 | up_J   |
| Md_2575:1:a   | MdMYB6 transcription factor                                          | Nucleic acid binding                                                 | up_J   |
| Md_2582:1:a   | Lipoxygenase (EC=1.13.11.12)                                         | Ion binding, oxidoreductase activity                                 | up_J   |
| Md_259:7:a    | Uncharacterized protein                                              | Hydrolase activity                                                   | up_J   |
| Md_2594:1:0:b | Vacuolar acid invertase (EC=3.2.1.26)                                | Hydrolase activity                                                   | down_J |
| Md_2750:1:a   | LEA/dehydrin                                                         | Unknown molecular function                                           | up_J   |
| Md_27611:s    | Initiation factor eIF-4 gamma, middle                                | Protein binding, nucleic acid binding                                | up_J   |



|               |                                                           |                                                                                                                                                  |        |
|---------------|-----------------------------------------------------------|--------------------------------------------------------------------------------------------------------------------------------------------------|--------|
| Md_2788:1:a   | No match found                                            | Unknown molecular function                                                                                                                       | down_J |
| Md_2827:2:a   | Cryptochrome 1                                            | Lyase activity, transmembrane transporter activity                                                                                               | up_J   |
| Md_288:2:a    | Ferritin                                                  | Ion binding, oxidoreductase activity                                                                                                             | up_J   |
| Md_2896:1:0:b | Uncharacterized protein                                   | Unknown molecular function                                                                                                                       | up_J   |
| Md_294:2:a    | NADH dehydrogenase ND 4 subunit (EC=1.6.5.3)              | Oxidoreductase activity, cofactor binding, tetrapyrrole binding                                                                                  | up_J   |
| Md_2976:1:a   | E6-1 protein kinase (EC=2.7.1.-)                          | Transferase activity                                                                                                                             | down_J |
| Md_3129:1:a   | No match found                                            | Unknown molecular function                                                                                                                       | up_J   |
| Md_3190:1:a   | 3-ketoacyl-CoA thiolase B (EC=2.3.1.16)                   | Transferase activity                                                                                                                             | up_J   |
| Md_3203:1:a   | ATP binding protein                                       | Transferase activity, nucleotide binding, protein binding                                                                                        | up_J   |
| Md_323:1:a    | Ripening-induced protein 1                                | Structural constituent of cell wall                                                                                                              | up_J   |
| Md_323:2:a    | Proline-rich cell wall protein                            | Structural constituent of cell wall                                                                                                              | up_J   |
| Md_33654:s    | Endoglucanase (EC=3.2.1.4)                                | Hydrolase activity, carbohydrate binding                                                                                                         | up_J   |
| Md_34857:s    | Uncharacterized protein                                   | Nucleic acid binding                                                                                                                             | up_J   |
| Md_3600:3:a   | PsbP domain-containing protein 1, chloroplastic           | Ion binding                                                                                                                                      | down_J |
| Md_3669:1:a   | Hydrolase, hydrolyzing O-glycosyl compounds (EC=2.4.1.67) | Hydrolase activity                                                                                                                               | up_J   |
| Md_370:s      | Glycosyl hydrolase (EC=3.2.1.-)                           | Hydrolase activity                                                                                                                               | up_J   |
| Md_373:3:a    | UDP-glucose glucosyltransferase (EC=2.4.1.11)             | Transferase activity                                                                                                                             | up_J   |
| Md_3747:1:a   | Protein SSM1                                              | Hydrolase activity                                                                                                                               | up_J   |
| Md_382:1:a    | Cysteine synthase (EC=2.5.1.47)                           | Transferase activity, lyase activity, transmembrane transporter activity, cofactor binding, tetrapyrrole binding, lipid binding, vitamin binding | up_K   |
| Md_3836:1:a   | Polyneuridine-aldehyde esterase (EC=3.1.1.78)             | Hydrolase activity                                                                                                                               | up_J   |

|               |                                                                   |                                                                                                           |        |
|---------------|-------------------------------------------------------------------|-----------------------------------------------------------------------------------------------------------|--------|
| Md_3896:1:0:b | WRKY4 transcription factor                                        | Nucleic acid binding                                                                                      | up_J   |
| Md_403:5:a    | Glycine-rich protein                                              | Structural constituent of cell wall                                                                       | down_J |
| Md_4050:1:a   | No match found                                                    | Unknown molecular function                                                                                | up_J   |
| Md_40605:s    | Ethylene-responsive AP2/ERF transcription factor                  | Nucleic acid binding                                                                                      | up_J   |
| Md_40927:s    | NB-ARC domain-containing protein                                  | Hydrolase activity, nucleotide binding, protein binding                                                   | up_J   |
| Md_41108:s    | bHLH transcription factor                                         | Nucleotide binding, nucleic acid binding                                                                  | up_J   |
| Md_419:3:a    | Cell wall-plasma membrane linker protein                          | Structural constituent of cell wall                                                                       | up_J   |
| Md_4328:1:a   | Alpha-glucosidase (EC=3.2.1.20)                                   | Hydrolase activity                                                                                        | up_J   |
| Md_4363:1:a   | Uncharacterized protein                                           | Transferase activity, isomerase activity                                                                  | up_J   |
| Md_4451:1:a   | Jasmonate induced protein                                         | Unknown molecular function                                                                                | down_K |
| Md_4451:1:a   | Jasmonate induced protein                                         | Unknown molecular function                                                                                | up_J   |
| Md_48:1:a     | Aldehyde dehydrogenase, RF2 (EC=1.2.1.3)                          | Hydrolase activity, nucleotide binding                                                                    | up_J   |
| Md_4837:1:a   | No match found                                                    | Unknown molecular function                                                                                | down_J |
| Md_4900:1:a   | Receptor protein kinase, CLAVATA1 (EC=1.3.1.74, EC=2.7.10.1)      | Hydrolase activity, transferase activity, nucleotide binding, protein binding, signal transducer activity | up_J   |
| Md_4972:1:a   | Fructose-bisphosphate aldolase (EC=4.1.2.13)                      | Lyase activity, transmembrane transporter activity                                                        | up_J   |
| Md_50213:s    | Chromatin remodeling complex subunit                              | Hydrolase activity, nucleotide binding, nucleic acid binding                                              | up_J   |
| Md_5069:1:a   | Uncharacterized protein                                           | Ion binding, lyase activity, transmembrane transporter activity                                           | down_K |
| Md_50991:s    | Anthranilate N-hydroxycinnamoyl/benzoyltransferase (EC=2.3.1.144) | Transferase activity                                                                                      | up_J   |
| Md_51:1:a     | No match found                                                    | Unknown molecular function                                                                                | up_J   |
| Md_5321:1:a   | Uncharacterized protein At5g11550                                 | Protein binding                                                                                           | down_J |

|               |                                                                |                                                                                                                 |        |
|---------------|----------------------------------------------------------------|-----------------------------------------------------------------------------------------------------------------|--------|
| Md_5375:1:a   | Respiratory burst NADPH-oxidase (EC=1.6.99.-)                  | Ion binding, oxidoreductase activity, nucleotide binding, cofactor binding, tetrapyrrole binding                | up_J   |
| Md_5413:2:a   | Ankyrin repeat-containing protein                              | Unknown molecular function                                                                                      | up_J   |
| Md_5550:1:a   | IAA-amino acid hydrolase, ILR1 (EC=3.5.1.32)                   | Hydrolase activity, protein binding                                                                             | up_J   |
| Md_564:1:a    | Cadmium induced protein CdI19                                  | Ion binding                                                                                                     | up_J   |
| Md_5687:1:a   | Uncharacterized protein                                        | Hydrolase activity, protein binding                                                                             | up_J   |
| Md_5724:1:a   | Zinc finger protein CONSTANS-LIKE 5                            | Ion binding                                                                                                     | down_J |
| Md_57702:s    | Uncharacterized protein At5g05840                              | Unknown molecular function                                                                                      | down_J |
| Md_5793:1:0:b | Mitogen-activated protein kinase kinase (MAPKK) (EC=2.7.11.25) | Transferase activity, nucleotide binding, protein binding, kinase regulator activity, enzyme activator activity | up_J   |
| Md_6:53:a     | Endonuclease/exonuclease/phosphatase                           | Hydrolase activity                                                                                              | up_J   |
| Md_60011:s    | No match found                                                 | Unknown molecular function                                                                                      | down_J |
| Md_60263:s    | Metal ion binding protein                                      | Ion binding                                                                                                     | up_J   |
| Md_6068:1:a   | No match found                                                 | Unknown molecular function                                                                                      | up_J   |
| Md_6098:1:a   | No match found                                                 | Unknown molecular function                                                                                      | up_J   |
| Md_612:1:a    | Beta-galactosidase (EC=3.2.1.23)                               | Ion binding, hydrolase activity, carbohydrate binding                                                           | up_J   |
| Md_6142:1:a   | Subtilisin-like protease (EC=3.4.21)                           | Ion binding, hydrolase activity, protein binding                                                                | up_J   |
| Md_6192:1:a   | Omega-3 fatty acid desaturase (EC=1.14.99.-)                   | Oxidoreductase activity                                                                                         | up_J   |
| Md_6231:1:a   | Microtubule-associated protein, TORTIFOLIA1                    | Protein binding                                                                                                 | up_J   |
| Md_6240:1:a   | Zinc finger homeodomain protein SZF-HD1                        | Nucleic acid binding                                                                                            | down_J |
| Md_6435:1:a   | Uncharacterized protein                                        | Signal transducer activity                                                                                      | up_J   |
| Md_6531:1:a   | MdMYB8 transcription factor                                    | Nucleic acid binding                                                                                            | up_J   |

|               |                                                    |                                                                                              |        |
|---------------|----------------------------------------------------|----------------------------------------------------------------------------------------------|--------|
| Md_66:2:a     | Carbonic anhydrase, chloroplastic (EC=4.2.1.1)     | Ion binding, lyase activity, transmembrane transporter activity                              | up_J   |
| Md_66411:s    | Ubiquitin-protein ligase (EC=6.3.2.19)             | Protein binding, ligase activity                                                             | up_J   |
| Md_6659:1:a   | Synaptotagmin                                      | Lipid binding                                                                                | up_J   |
| Md_6703:1:a   | Uncharacterized protein                            | Unknown molecular function                                                                   | up_J   |
| Md_67394:s    | Peroxidase (EC=1.11.1.7)                           | Ion binding, oxidoreductase activity                                                         | up_J   |
| Md_674:s      | Plasma membrane H <sup>+</sup> ATPase (EC=3.6.1.3) | Ion binding, hydrolase activity, nucleotide binding, substrate-specific transporter activity | up_J   |
| Md_6808:1:a   | UDP-glucose glucosyltransferase (EC=2.4.1.11)      | Transferase activity                                                                         | up_J   |
| Md_69440:s    | SGT1-like protein                                  | Protein binding                                                                              | down_J |
| Md_6974:1:0:b | Uncharacterized protein                            | Unknown molecular function                                                                   | up_J   |
| Md_6997:1:0:b | Uncharacterized protein                            | Unknown molecular function                                                                   | down_J |
| Md_7045:1:a   | Gibberellin 2-oxidase (EC=1.14.11.-)               | Ion binding, oxidoreductase activity                                                         | up_J   |
| Md_7112:2:a   | WRKY19 transcription factor                        | Hydrolase activity, protein binding, nucleic acid binding                                    | up_J   |
| Md_71285:s    | Myo-inositol oxygenase (EC=1.13.99.1)              | Ion binding, oxidoreductase activity                                                         | up_J   |
| Md_7162:1:a   | WD-repeat protein (EC=2.7.11.7)                    | Unknown molecular function                                                                   | up_J   |
| Md_7242:1:a   | No match found                                     | Unknown molecular function                                                                   | up_J   |
| Md_7330:1:a   | Oligopeptide transporter                           | Substrate-specific transporter activity                                                      | up_J   |
| Md_7412:1:a   | Chloroplast-targeted copper chaperone              | Ion binding                                                                                  | up_J   |
| Md_74377:s    | Cytokinin dehydrogenase (EC=1.5.99.12)             | Oxidoreductase activity, nucleotide binding, cofactor binding, tetrapyrrole binding          | up_J   |
| Md_74434:s    | Myo-inositol oxygenase (EC=1.13.99.1)              | Ion binding, oxidoreductase activity                                                         | up_J   |
| Md_75:5:a     | Class III chitinase (EC=3.2.1.14)                  | Ion binding, hydrolase activity                                                              | up_J   |

|             |                                                            |                                                                                       |        |
|-------------|------------------------------------------------------------|---------------------------------------------------------------------------------------|--------|
| Md_7571:1:a | Coatomer beta subunit (EC=2.7.11.7)                        | Protein binding                                                                       | up_J   |
| Md_7638:1:a | Uncharacterized protein At1g21390                          | Unknown molecular function                                                            | up_J   |
| Md_770:2:a  | Uncharacterized protein                                    | Transferase activity, nucleotide binding, structural constituent of cell wall         | down_J |
| Md_77189:s  | Uncharacterized protein                                    | Oxidoreductase activity                                                               | up_J   |
| Md_77513:s  | Uncharacterized protein                                    | Unknown molecular function                                                            | up_J   |
| Md_78298:s  | L-aspartate oxidase (EC=1.4.3.16)                          | Oxidoreductase activity                                                               | up_J   |
| Md_79388:s  | Ribulose biphosphate carboxylase small chain (EC=4.1.1.39) | Oxidoreductase activity, lyase activity, transmembrane transporter activity           | up_J   |
| Md_8:16:a   | Polyphenol oxidase, chloroplastic (EC=1.10.3.1)            | Ion binding, oxidoreductase activity                                                  | up_J   |
| Md_81431:s  | Uncharacterized protein At5g23890                          | Unknown molecular function                                                            | up_J   |
| Md_8451:1:a | UDP-glucuronosyltransferase (EC=2.4.1.115)                 | Transferase activity                                                                  | up_J   |
| Md_8531:1:a | 30S ribosomal protein S15, chloroplastic                   | Structural constituent of ribosome                                                    | up_J   |
| Md_8558:1:a | Clathrin assembly protein At2g25430                        | Protein binding, lipid binding                                                        | up_J   |
| Md_869:1:a  | Malate dehydrogenase, malic enzyme (EC=1.1.1.40)           | Ion binding, oxidoreductase activity, cofactor binding, tetrapyrrole binding          | up_J   |
| Md_8693:1:a | Chitin-inducible protein                                   | Unknown molecular function                                                            | up_J   |
| Md_8742:1:a | No match found                                             | Unknown molecular function                                                            | up_J   |
| Md_8837:1:a | Uncharacterized protein                                    | Unknown molecular function                                                            | up_J   |
| Md_8959:1:a | Uncharacterized protein                                    | Unknown molecular function                                                            | up_J   |
| Md_9063:1:a | Phosphoenolpyruvate carboxylase (EC=1.3.1.74)              | Lyase activity, transmembrane transporter activity                                    | up_J   |
| Md_9130:1:a | Leucine-rich repeat receptor-like kinase                   | Transferase activity, nucleotide binding, protein binding, signal transducer activity | up_J   |
| Md_9183:1:a | Uncharacterized protein                                    | Unknown molecular function                                                            | up_J   |

|             |                                                            |                                                                             |        |
|-------------|------------------------------------------------------------|-----------------------------------------------------------------------------|--------|
| Md_92075:s  | Uncharacterized protein At1g09290                          | Unknown molecular function                                                  | up_J   |
| Md_92669:s  | Ribulose biphosphate carboxylase small chain (EC=4.1.1.39) | Oxidoreductase activity, lyase activity, transmembrane transporter activity | down_J |
| Md_93:4:a   | 14-3-3-like protein                                        | Protein binding                                                             | down_J |
| Md_93451:s  | ATP-binding cassette transporter (EC=3.6.3.28)             | Hydrolase activity, nucleotide binding                                      | down_J |
| Md_9390:1:a | Auxin response factor 3 (ARF3)                             | Nucleic acid binding                                                        | up_J   |
| Md_93992:s  | Uncharacterized protein                                    | Unknown molecular function                                                  | up_K   |
| Md_94413:s  | Arabidopsis Mei2-like 1, AML1                              | Nucleotide binding, nucleic acid binding                                    | up_J   |
| Md_9554:1:a | (-)-germacrene D synthase (EC=4.2.3.22)                    | Ion binding, lyase activity, transmembrane transporter activity             | down_K |
| Md_9554:1:a | Sesquiterpene synthase (EC=4.2.3.22)                       | Ion binding, lyase activity, transmembrane transporter activity             | up_J   |
| Md_9662:1:a | Sucrose synthase (EC= 2.4.1.13)                            | Transferase activity                                                        | up_J   |
| Md_9772:1:a | ATP binding protein                                        | Transferase activity, nucleotide binding, protein binding                   | up_J   |
| Md_9928:1:a | ANP32/acidic nuclear phosphoprotein                        | Protein binding                                                             | up_J   |

---

**Table S5 – Genes differentially expressed in the seed of fruitlets that were induced to abscise upon BA treatment.**

A tentative annotation (with EC number when available), and the expression pattern is reported for each gene (up\_J = up-regulated from T0 to T2; down\_J = down-regulated from T0 to T2; up\_K = up-regulated from T2 to T3; down\_K = down-regulated from T2 to T3).

| Gene_ID      | Tentative annotation (EC)                                    | Molecular function                                                                                           | Exp.   |
|--------------|--------------------------------------------------------------|--------------------------------------------------------------------------------------------------------------|--------|
| Md_10154:1:a | 1-acyl-sn-glycerol-3-phosphate acyltransferase (EC=2.3.1.51) | Transferase activity                                                                                         | down_K |
| Md_1024:1:a  | Polyphenol oxidase, chloroplast (EC=1.10.3.1)                | Ion binding, oxidoreductase activity                                                                         | down_J |
| Md_102479:s  | No match found                                               | Unknown molecular function                                                                                   | up_K   |
| Md_103049:s  | Uncharacterized protein                                      | Protein binding                                                                                              | up_K   |
| Md_105836:s  | Amino acid transporter                                       | Transmembrane transporter activity, substrate-specific transporter activity                                  | up_J   |
| Md_10661:1:a | No match found                                               | Unknown molecular function                                                                                   | up_J   |
| Md_114537:s  | Homeobox-leucine zipper protein ATHB-40                      | Nucleic acid binding                                                                                         | up_K   |
| Md_11646:1:a | Protein synthesis inhibitor, DPH2                            | Unknown molecular function                                                                                   | up_J   |
| Md_12112:1:a | No match found                                               | Unknown molecular function                                                                                   | up_J   |
| Md_1225:1:a  | Glycerol-3-phosphate acyltransferase (EC=2.3.1.15)           | Transferase activity                                                                                         | up_K   |
| Md_124360:s  | H <sup>+</sup> -translocating pyrophosphatase (EC=3.6.1.1)   | Hydrolase activity, ion binding, transmembrane transporter activity, substrate-specific transporter activity | up_J   |
| Md_125286:s  | Heat shock protein 70-2                                      | Nucleotide binding                                                                                           | down_J |
| Md_1263:1:a  | Metal ion binding protein                                    | Ion binding                                                                                                  | down_J |
| Md_132121:s  | Probable inositol transporter                                | Transmembrane transporter activity, substrate-specific transporter activity                                  | down_K |
| Md_134601:s  | Hydrolase, hydrolyzing O-glycosyl compounds (EC=3.1.1.-)     | Hydrolase activity, ion binding                                                                              | down_J |

|              |                                                                 |                                                                             |        |
|--------------|-----------------------------------------------------------------|-----------------------------------------------------------------------------|--------|
| Md_13925:1:a | Subtilisin                                                      | Hydrolase activity, protein binding                                         | up_K   |
| Md_14561:s   | Uncharacterized protein                                         | Unknown molecular function                                                  | up_J   |
| Md_150042:s  | Septum site-determining protein minD                            | Hydrolase activity, protein binding                                         | down_J |
| Md_150042:s  | Septum site-determining protein minD                            | Hydrolase activity, protein binding                                         | up_K   |
| Md_15425:1:a | 2-oxoglutarate/malate translocator                              | Transmembrane transporter activity, substrate-specific transporter activity | up_J   |
| Md_15698:1:a | Uncharacterized protein                                         | Ion binding, nucleic acid binding                                           | up_J   |
| Md_160835:s  | Uncharacterized protein                                         | Unknown molecular function                                                  | up_K   |
| Md_176079:s  | Nucleoid chloroplast DNA-binding protein                        | Hydrolase activity, nucleic acid binding                                    | up_J   |
| Md_176335:s  | Uncharacterized protein                                         | Ion binding                                                                 | up_K   |
| Md_177051:s  | Uncharacterized protein                                         | Transferase activity                                                        | up_K   |
| Md_17879:1:a | Uncharacterized protein                                         | Unknown molecular function                                                  | down_J |
| Md_17879:1:a | Uncharacterized protein                                         | Unknown molecular function                                                  | up_K   |
| Md_1844:2:a  | ALG2-interacting protein                                        | Protein binding                                                             | up_K   |
| Md_1867:1:a  | No match found                                                  | Unknown molecular function                                                  | up_K   |
| Md_19486:1:a | Bell homeotic protein                                           | Nucleic acid binding                                                        | up_K   |
| Md_20016:1:a | Uncharacterized protein                                         | Structural constituent of cell wall                                         | up_J   |
| Md_20453:1:a | Aspartic proteinase, nepenthesin-1 (EC=3.4.23.6)                | Hydrolase activity, nucleic acid binding                                    | up_K   |
| Md_20513:1:a | DEAD-box ATP-dependent RNA helicase (EC=3.6.1.-)                | Hydrolase activity, nucleotide binding, nucleic acid binding                | up_K   |
| Md_20585:1:a | Cleavage and polyadenylation specificity factor, 73 kDa subunit | Hydrolase activity, protein binding                                         | up_J   |
| Md_219638:s  | Uncharacterized protein                                         | Transferase activity, nucleotide binding                                    | down_J |



|             |                                                          |                                                                                                                                                          |        |
|-------------|----------------------------------------------------------|----------------------------------------------------------------------------------------------------------------------------------------------------------|--------|
| Md_219638:s | Uncharacterized protein                                  | Transferase activity, nucleotide binding                                                                                                                 | up_K   |
| Md_219708:s | No match found                                           | Unknown molecular function                                                                                                                               | up_J   |
| Md_220544:s | No match found                                           | Unknown molecular function                                                                                                                               | up_K   |
| Md_237503:s | One helix protein                                        | Unknown molecular function                                                                                                                               | up_J   |
| Md_238804:s | Uncharacterized protein                                  | Hydrolase activity, transferase activity, nucleotide binding, structural constituent of cell wall, signal transducer activity, enzyme inhibitor activity | up_K   |
| Md_241578:s | Fructose-1,6-bisphosphatase, chloroplastic (EC=3.1.3.11) | Hydrolase activity, ion binding                                                                                                                          | up_J   |
| Md_248247:s | Serine/threonine-protein kinase (EC=2.7.11.17)           | Hydrolase activity, transferase activity, nucleotide binding, protein binding                                                                            | up_J   |
| Md_288:2:a  | Ferritin (EC=1.16.3.1)                                   | Ion binding, oxidoreductase activity                                                                                                                     | up_K   |
| Md_2943:1:a | Uncharacterized protein                                  | Unknown molecular function                                                                                                                               | up_K   |
| Md_3290:2:a | MADS-box transcription factor, STK/AGL11                 | Nucleic acid binding                                                                                                                                     | down_J |
| Md_3329:1:a | Ethylene responsive AP2/ERF transcription factor         | Nucleic acid binding                                                                                                                                     | up_K   |
| Md_4091:1:a | Uncharacterized protein                                  | Transferase activity, ion binding                                                                                                                        | up_K   |
| Md_4146:1:a | Dynein                                                   | Hydrolase activity                                                                                                                                       | up_K   |
| Md_4628:1:a | High affinity nitrate transporter                        | Transmembrane transporter activity, substrate-specific transporter activity                                                                              | up_K   |
| Md_4950:1:a | F-box family protein                                     | Protein binding                                                                                                                                          | up_K   |
| Md_4981:1:a | No match found                                           | Unknown molecular function                                                                                                                               | up_K   |
| Md_5177:1:a | Purple acid phosphatase (EC=3.1.3.2)                     | Hydrolase activity                                                                                                                                       | up_K   |
| Md_5177:1:a | Purple acid phosphatase (EC=3.1.4.46)                    | Hydrolase activity                                                                                                                                       | down_J |
| Md_5416:1:a | Probable glycerophosphoryl diester phosphodiesterase     | Hydrolase activity, transferase activity, nucleotide binding                                                                                             | up_J   |

|             |                                                          |                                                                                                                     |        |
|-------------|----------------------------------------------------------|---------------------------------------------------------------------------------------------------------------------|--------|
| Md_556:2:a  | Uncharacterized protein                                  | Unknown molecular function                                                                                          | up_K   |
| Md_570:2:a  | Dehydrin, ABA responsive                                 | Unknown molecular function                                                                                          | up_K   |
| Md_59405:s  | NADH-Monodehydroascorbate reductase (EC=1.6.5.4)         | Nucleotide binding, oxidoreductase activity, cofactor binding                                                       | up_K   |
| Md_60462:s  | Inositol polyphosphate multikinase alpha (EC=2.7.1.140)  | Transferase activity                                                                                                | up_J   |
| Md_618:1:a  | Hydrolase, hydrolyzing O-glycosyl compounds (EC=3.1.1.-) | Hydrolase activity, ion binding                                                                                     | down_J |
| Md_74377:s  | Cytokinin dehydrogenase (EC=1.5.92.12)                   | Nucleotide binding, oxidoreductase activity, cofactor binding                                                       | up_K   |
| Md_770:1:a  | Proline-rich cell wall protein                           | Transferase activity, nucleotide binding, structural constituent of cell wall                                       | up_K   |
| Md_78200:s  | CC-NBS-LRR resistance protein                            | Nucleotide binding, protein binding                                                                                 | up_K   |
| Md_7948:1:a | Uncharacterized protein                                  | Unknown molecular function                                                                                          | down_J |
| Md_7974:1:a | Uncharacterized protein                                  | Transferase activity, nucleic acid binding                                                                          | up_K   |
| Md_82931:s  | Laccase (EC=1.10.3.2)                                    | Ion binding, oxidoreductase activity                                                                                | up_K   |
| Md_843:4:a  | Ubiquitin carboxyl-terminal hydrolase (EC=3.1.2.15)      | Hydrolase activity                                                                                                  | down_J |
| Md_843:4:a  | Ubiquitin carboxyl-terminal hydrolase (EC=3.1.2.15)      | Hydrolase activity                                                                                                  | up_K   |
| Md_89293:s  | Uncharacterized protein                                  | Unknown molecular function                                                                                          | up_K   |
| Md_9315:1:a | Galactinol synthase (EC=2.4.1.123)                       | Transferase activity                                                                                                | up_K   |
| Md_9430:1:a | Uncharacterized protein                                  | Unknown molecular function                                                                                          | up_K   |
| Md_9597:1:a | ATP synthase subunit beta (EC=3.6.3.14)                  | Hydrolase activity, nucleotide binding, transmembrane transporter activity, substrate-specific transporter activity | down_J |
| Md_9597:1:a | ATP synthase subunit beta (EC=3.6.3.14)                  | Hydrolase activity, nucleotide binding, transmembrane transporter activity, substrate-specific transporter activity | up_K   |
| Md_965:2:a  | Uncharacterized protein                                  | Hydrolase activity                                                                                                  | up_K   |
| Md_9712:1:a | No match found                                           | Unknown molecular function                                                                                          | up_K   |

|            |                                          |                                    |      |
|------------|------------------------------------------|------------------------------------|------|
| Md_97343:s | Ribosomal protein L19                    | Structural constituent of ribosome | up_K |
| Md_98050:s | Alpha/beta fold family protein hydrolase | Hydrolase activity                 | up_J |

---

**Table S6 – Primers used in qPCR experiments given in 5’-3’ orientation.**

The last five genes were used as reference for qPCR normalization in the cortex (indicated by asterisks). As far as the seed, only *Md18S* was used as a reference (indicated by two asterisks).

| Gene (Array ID)              | Forward primer            | Reverse primer           | Reference            |
|------------------------------|---------------------------|--------------------------|----------------------|
| <i>MdACO1</i>                | CAGTCGGATGGGACCAGAA       | GCTTGGAATTTTCAGGCCAGA    | Dal Cin et al., 2005 |
| <i>MdACS5B</i>               | CACATGCGCTTCACAATG        | CTTGAGCAGCCTACGCAA       | Dal Cin et al., 2005 |
| <i>ERS2</i> (Md_247145:s)    | ATTGCCTGTTCATCCAACCTT     | TTGTCGATACCCTCGCTTTC     | -                    |
| <i>HB40</i> (Md_114537:s)    | AAGGGCTCGTTGGAAGAACA      | GCCTCCGACAGTTGATCCTT     | -                    |
| <i>MADS10</i> (Md_3290:2:a)  | TGGGTCAGAGATGAATGCAA      | TGGCTAAAGAAATGGCGAGAA    | -                    |
| <i>AP2/ERF</i> (Md_3329:1:a) | CAAAGTGTGGAGGTTTCGGTA     | CCACCCTTTGGTCAACACG      | -                    |
| <i>ACTIN3</i> (Md_507:4:a)   | ATCCCTCAGCACCTTCCAAC      | AGAAGCATTTCTGTGAACAA     | -                    |
| <i>TPS</i> (Md_15339:1:a)    | GCGAATGAGCCCGTAGTTGT      | CGCATTCCCATTACCAATCA     | -                    |
| <i>MYB8</i> (Md_6531:1:a)    | GGCATCTCCGAATCGACAC       | GGCTGCGAAATGGTATGGTT     | -                    |
| <i>JAI</i> (Md_4451:1:a)     | CCACTTCAAACCGCAGCAC       | CTGTTATTCCCGCCATGAGT     | -                    |
| <i>LEA/DEH2</i> (Md_570:2:a) | TGGCGGTGCTACTACAGGTG      | CTGCCGTAATCGTGACCAGT     | -                    |
| <i>LEA/DEH</i> (Md_425:1:a)  | GACCCACACGTATTCCACGA      | TGCGGACATCTGGTGAGTTC     | -                    |
| <i>MdUBI</i> *               | CATCCCCCAGACCAGCAGA       | ACCACGGAGACGCAACACCAA    | Dal Cin et al., 2005 |
| <i>Md18S</i> **              | GTTACTTTTAGGACTCCGCC      | TTCCTTTAAGTTTCAGCCTTG    | Dal Cin et al., 2005 |
| <i>MdACT</i> *               | TGACCGAATGAGCAAGGAAATTACT | TACTCAGCTTTGGCAATCCACATC | Li and Yuan, 2008    |
| Md_8283:1:a*                 | CTCGTCGTCTTGTTCCTGA       | GCCTAAGGACAGGTGGTCTATG   | -                    |
| Md_4592:1:a*                 | GTCGAAATGGTCAGCGGTAG      | GCAATGGCAAACCTCCACCTT    | -                    |

## Supplemental figure legends

**Figure S1** – The sequence clustering/assembling pipeline specifically set up for apple sequences. See materials and methods section for a detailed description.

**Figure S2** – Schematic representation of the experimental plan for microarray experiments (**A** = small lateral fruitlets; **B** = big lateral fruitlets; **C** = small central fruitlets; **D** = big central fruitlets; +BA = treatment with BA; T<sub>0</sub> = 15 days after petal fall; T<sub>2</sub> = 17 days after petal fall; T<sub>3</sub> = 19 days after petal fall). Each letter on the square brackets refers to a comparison between two samples.

**Figure S3** – Gene Ontology (GO) annotation of the 30,419 probes spotted on the apple microarray according to the molecular function (**A**), biological process (**B**), and cellular component (**C**) subvocabularies reported as percentage of the total sequences. In each chart, the Pearson correlation coefficients are reported with respect to the GO annotation pools of other important dicots for which a relevant number of genes have been annotated (*Arabidopsis thaliana*, *Vitis vinifera*, *Prunus persica*, and *Populus*).

**Figure S4** – Concentration of glucose, fructose, sorbitol, and starch in small (**A**) and big (**B**) lateral fruitlets, and in small (**C**) and big (**D**) central fruitlets, either untreated (circles and continuous line) or treated with BA (squares and dot-line). Bars represent standard deviation. DAPF: days after petal fall.

**Figure S5** – Flow-chart of the data processing. Laboratory work is evidenced by a green box, the Globaltest analysis by a yellow box, the differentially expressed (DE) genes discovery by a cyan box, the setting-up of the model by a pink box. The red boxes represent the two main statistical analyses carried out to obtain the candidate abscission-related genes. The number of biological replicates is indicated for the samples undergone Globaltest analysis (AP = abscission potential; NA = naturally abscising fruitlets; SA = strongly abscising fruitlets; PP = probably persisting fruitlets; SP = strongly persisting fruitlets).

**Figure S6** – Hierarchical clustering of the significantly variable transcriptome (see materials and methods section) in all samples of cortex (**A**) and seed (**B**). Samples are reported on the right side of the heatmap with the following codes: c: cortex, s: seed; L: lateral, C: central, B: treated with BA; first number indicates fruit size category: 1: small fruitlets, 3: big fruitlets; second number indicates

sampling time: 0: T0, 2:T2. 3:T3. SP: strongly persisting, PP: probably persisting, NA: naturally abscising, SA: strongly abscising.

**Figure S7** – Quantitative real-time PCR (qPCR) validation of selected genes in seed (left) and cortex (right) of L3 and LB3 samples. Transcript levels are reported for five genes for each tissue as normalized intensities for microarray analyses (in red coloration), and as Mean Normalized Expression for qPCR (in black coloration), for both untreated (circles and continuous line) and treated samples (squares and dot-line). Selected genes are: *ERS2* (Md\_247145:s), *HB40* (Md\_114537:s), *MADS10* (Md\_3290:2:a), *AP2/ERF* (Md\_3329:1:a), *ACTIN* (Md\_507:4:a), *TPS* (Md\_15339:1:a), *MYB8* (Md\_6531:1:a), *JAI* (Md\_4451:1:a), *LEA/DEH2* (Md\_570:2:a), *LEA/DEH* (Md\_425:1:a). In the bottom charts, correlations are shown for the same genes along with Pearson coefficient, considering normalized expression values of microarrays and qPCRs in all samples analyzed. DAPF: days after petal fall.

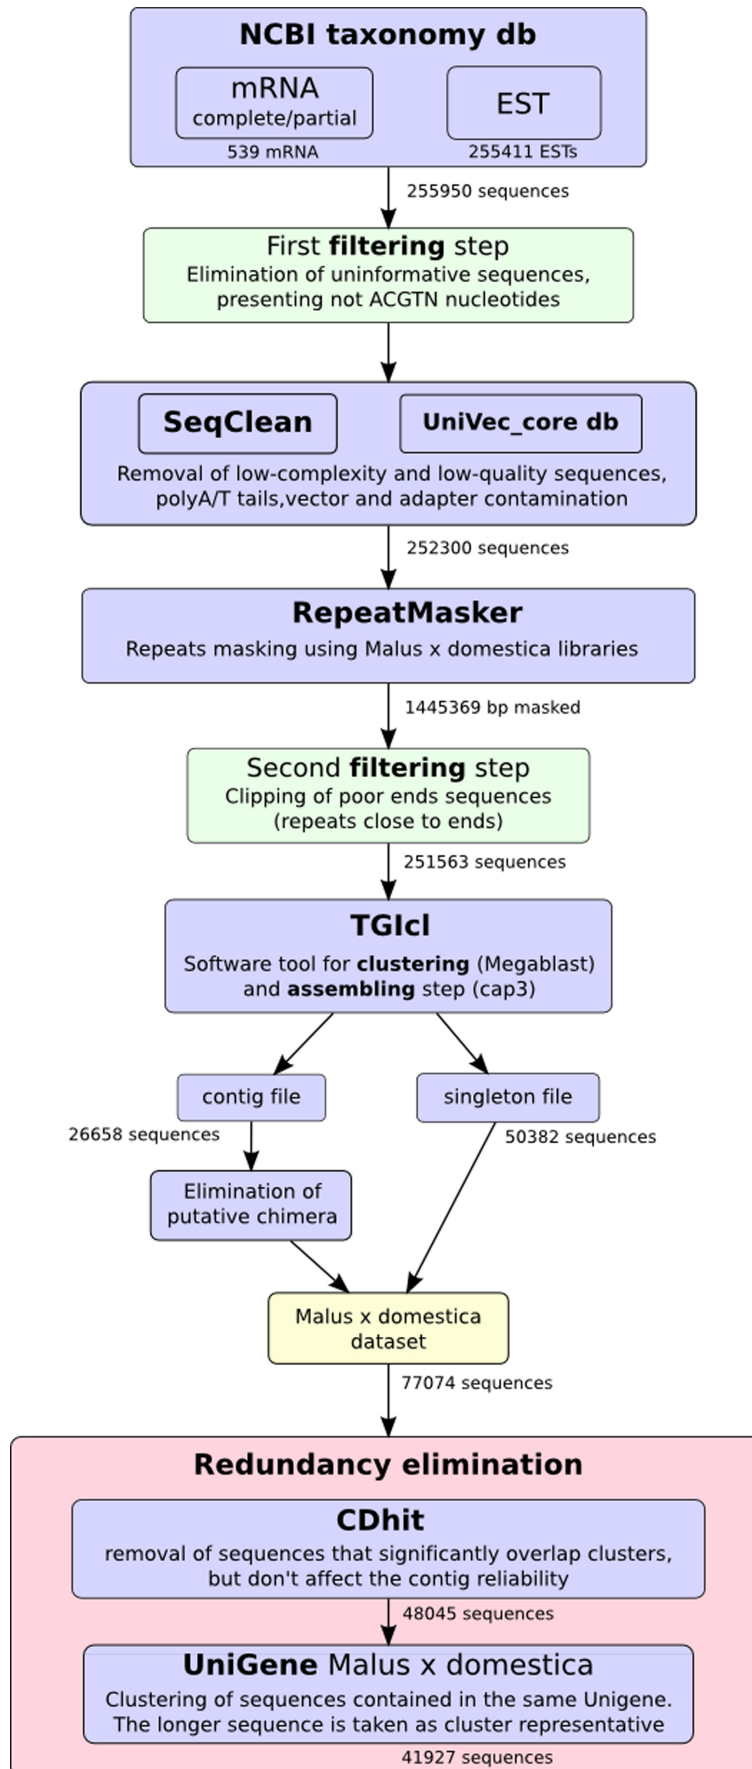

**Figure S1** – The sequence clustering/assembly pipeline specifically set up for apple sequences. See materials and methods section for a detailed description.

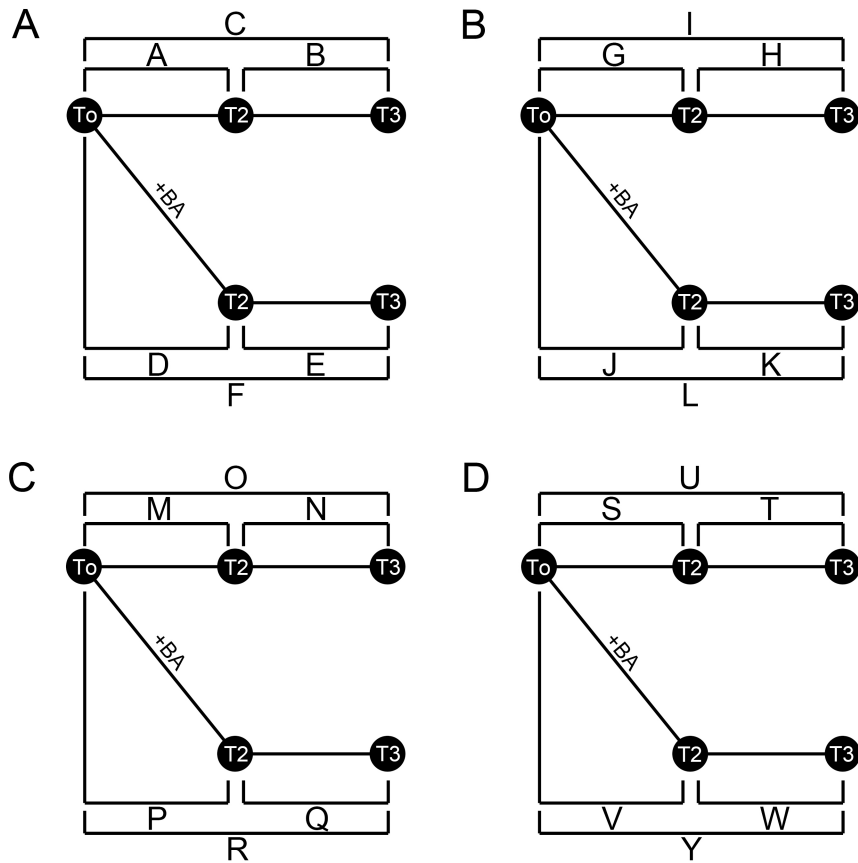

**Figure S2** – Schematic representation of the experimental plan for microarray experiments (**A** = small lateral fruitlets; **B** = big lateral fruitlets; **C** = small central fruitlets; **D** = big central fruitlets; +BA = treatment with BA; To= 15 days after petal fall; T2 = 17 days after petal fall; T3 = 19 days after petal fall). Each letter on the square brackets refers to a comparison between two samples.



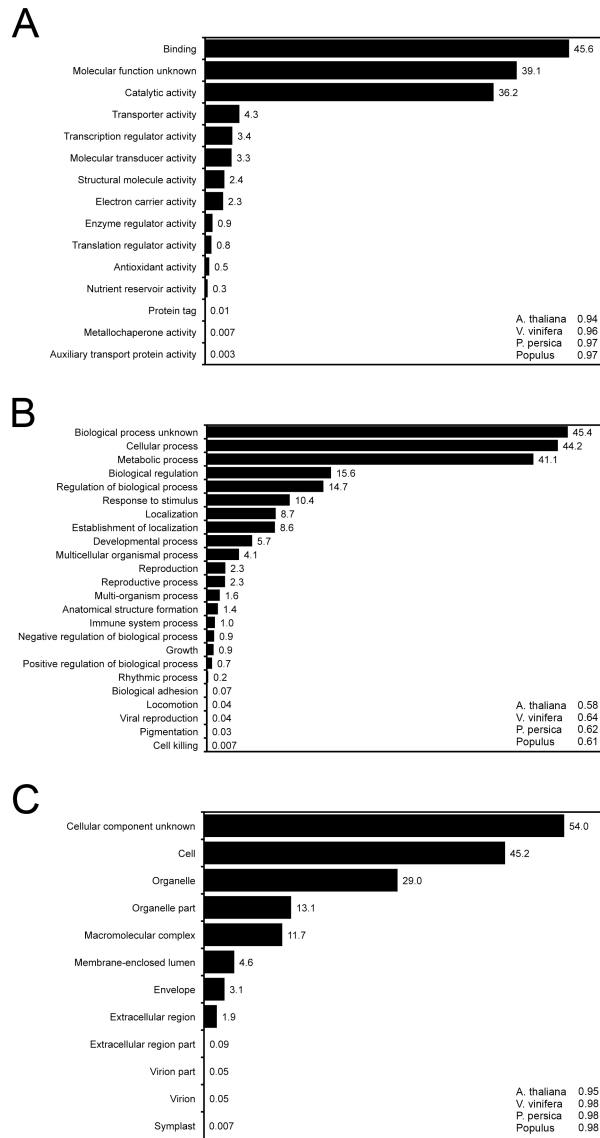

**Figure S3** – Gene Ontology (GO) annotation of the 30,419 probes spotted on the apple microarray according to the molecular function (**A**), biological process (**B**), and cellular component (**C**) subvocabularies reported as percentage of the total sequences. In each chart, the Pearson correlation coefficients are reported with respect to the GO annotation pools of other important dicots for which a relevant number of genes have been annotated (*Arabidopsis thaliana*, *Vitis vinifera*, *Prunus persica*, and *Populus*).

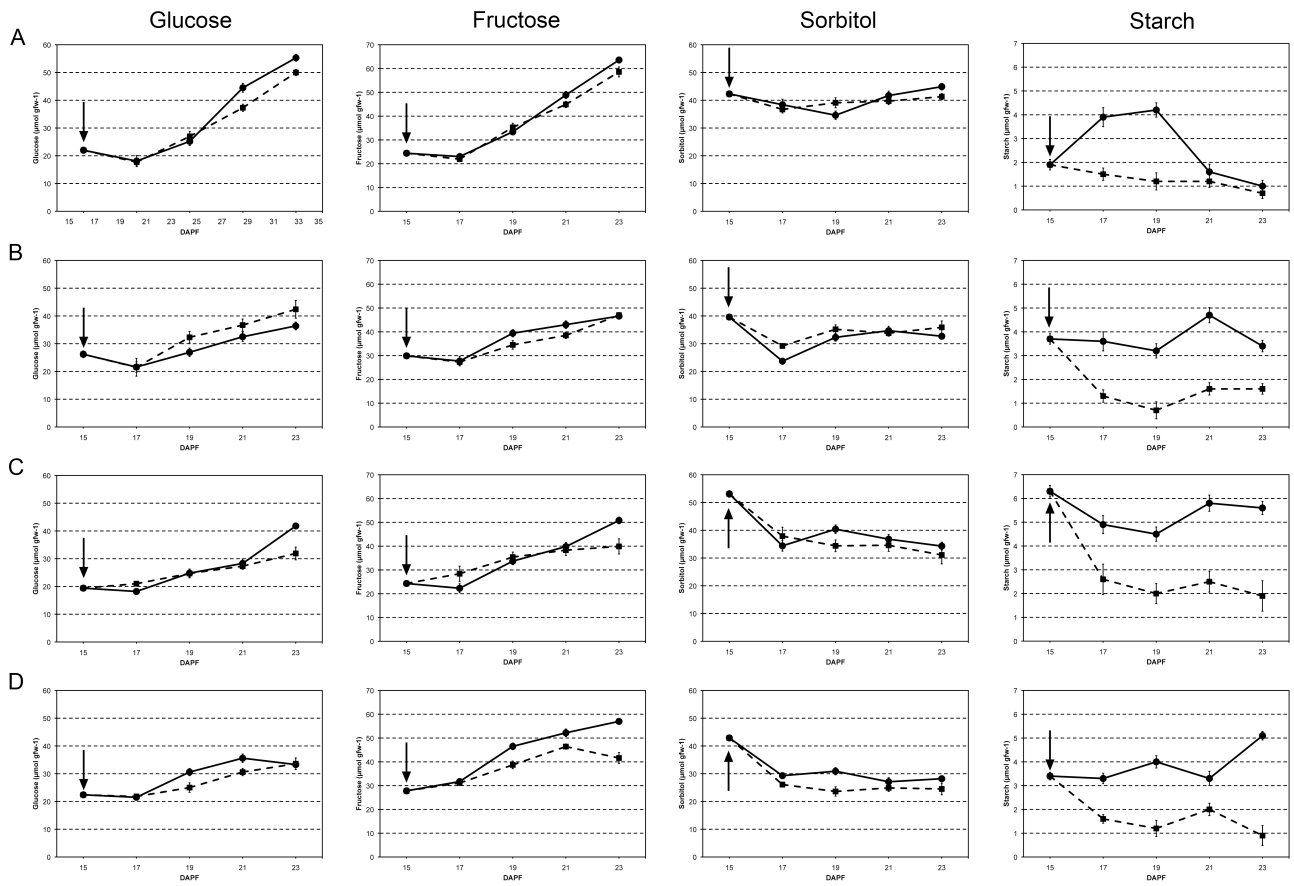

**Figure S4** – Concentration of glucose, fructose, sorbitol, and starch in small (**A**) and big (**B**) lateral fruitlets, and in small (**C**) and big (**D**) central fruitlets, either untreated (circles and continuous line) or treated with BA (squares and dot-line). Bars represent standard deviation. DAPF: days after petal fall.

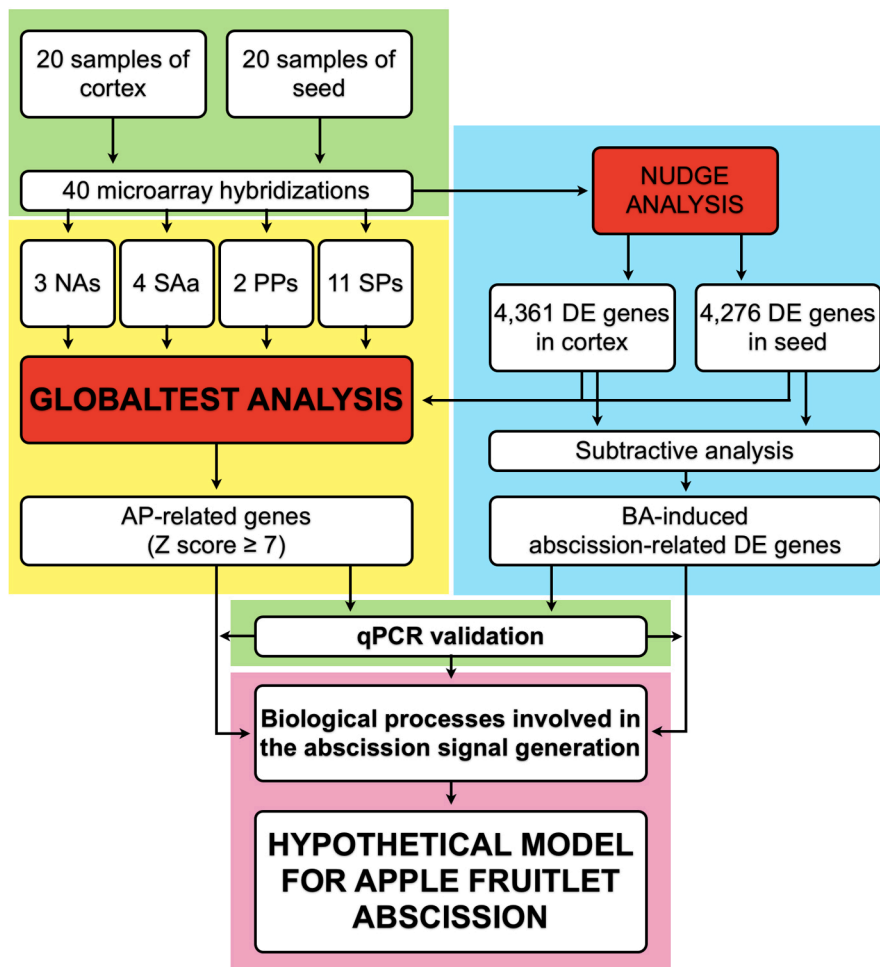

**Figure S5** – Flow-chart of the data processing. Laboratory work is evidenced by a green box, the Globaltest analysis by a yellow box, the differentially expressed (DE) genes discovery by a cyan box, the setting-up of the model by a pink box. The red boxes represent the two main statistical analyses carried out to obtain the candidate abscission-related genes. The number of biological replicates is indicated for the samples undergone Globaltest analysis (AP = abscission potential; NA = naturally abscising fruitlets; SA = strongly abscising fruitlets; PP = probably persisting fruitlets; SP = strongly persisting fruitlets).

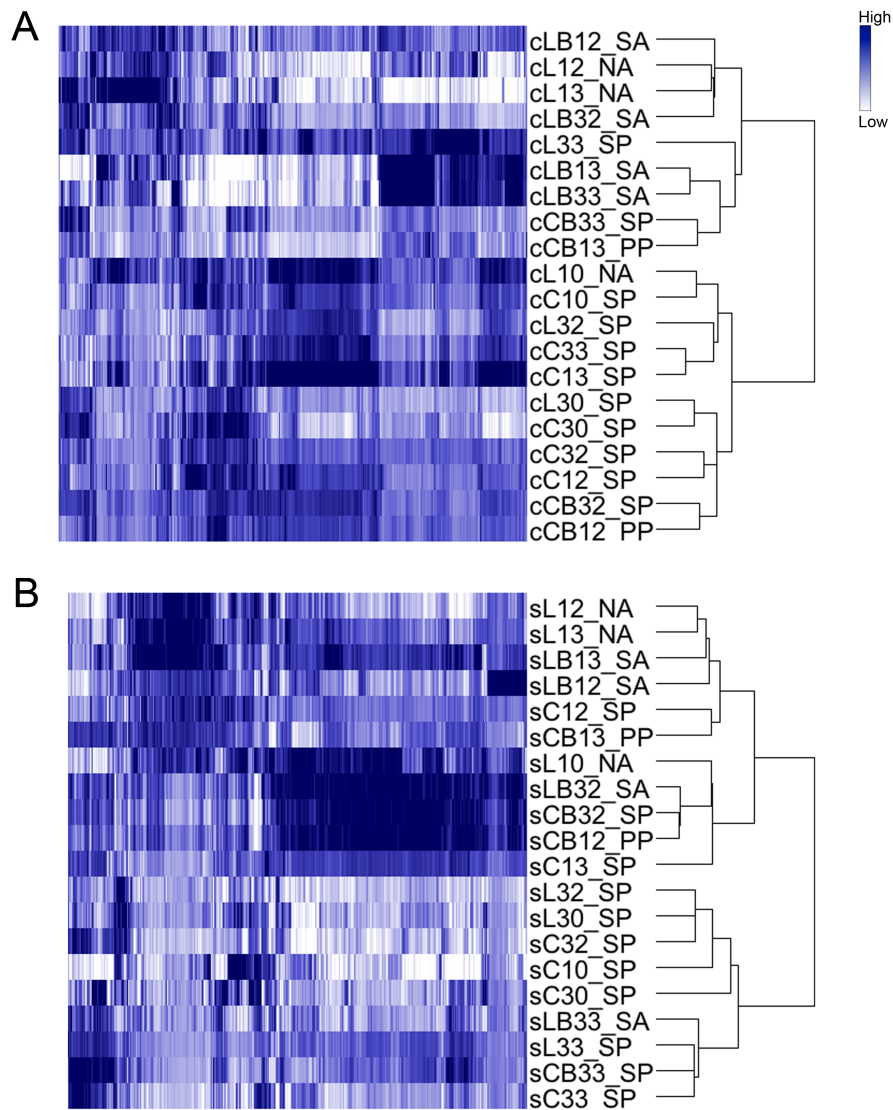

**Figure S6** – Hierarchical clustering of the significantly variable transcriptome (see materials and methods section) in all samples of cortex (**A**) and seed (**B**). Samples are reported on the right side of the heatmap with the following codes: c: cortex, s: seed; L: lateral, C: central, B: treated with BA; first number indicates fruit size category: 1: small fruitlets, 3: big fruitlets; second number indicates sampling time: 0: T0, 2:T2, 3:T3. SP: strongly persisting, PP: probably persisting, NA: naturally abscising, SA: strongly abscising.

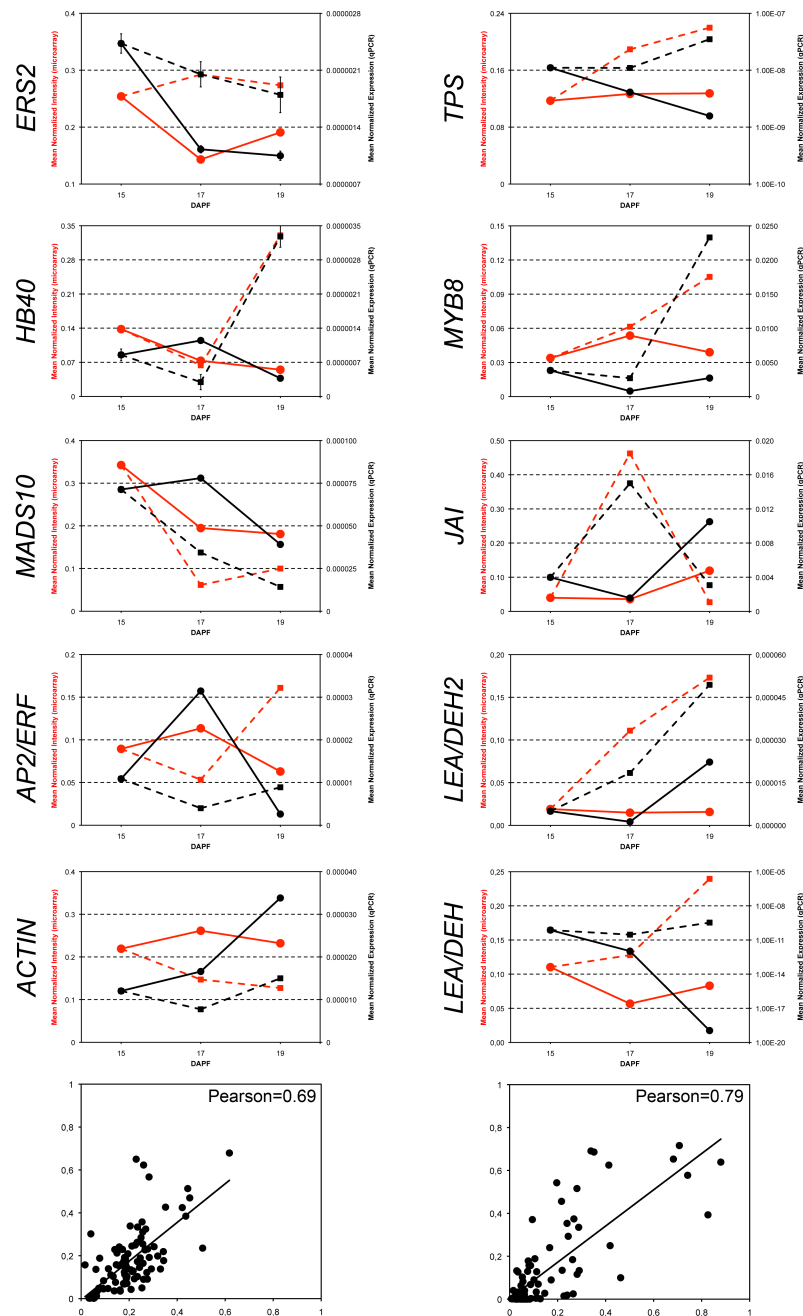

**Figure S7** – Quantitative real-time PCR (qPCR) validation of selected genes in seed (left) and cortex (right) of L3 and LB3 samples. Transcript levels are reported for five genes for each tissue as normalized intensities for microarray analyses (in red coloration), and as Mean Normalized Expression for qPCR (in black coloration), for both untreated (circles and continuous line) and treated samples (squares and dot-line). Selected genes are: *ERS2* (Md\_247145:s), *HB40* (Md\_114537:s), *MADS10* (Md\_3290:2:a), *AP2/ERF* (Md\_3329:1:a), *ACTIN* (Md\_507:4:a), *TPS* (Md\_15339:1:a), *MYB8* (Md\_6531:1:a), *JAI* (Md\_4451:1:a), *LEA/DEH2* (Md\_570:2:a), *LEA/DEH* (Md\_425:1:a). In the bottom charts, correlations are shown for the same genes along with Pearson coefficient, considering normalized expression values of microarrays and qPCRs in all samples analyzed. DAPF: days after petal fall.
